# Supplementary material for: Determining promoter location based on DNA structure first-principles calculations
Source: Springer Nature journal article supplement (doi:10.1186/gb-2007-8-12-r263), 2007-12-11
Supplement: Additional file 2 [file gb-2007-8-12-r263-s2.pdf]

| Program name | Prediction source                                                                                                                                                      | Configuration        | Homl | Gene | CpG | TATA |
|--------------|------------------------------------------------------------------------------------------------------------------------------------------------------------------------|----------------------|------|------|-----|------|
| McPromoter   | EGASP 7_80_8_ohler_mcpromoter_1113784666 <sup>a</sup><br>EGASP 7_81_8_ohler_mcpromoter_noshadows_1113785822 <sup>a</sup>                                               | standard; no shadows | No   | No   | No  | Yes  |
| N-SCAN       | EGASP 20_76_4_multiple_v1_1113763810 <sup>a</sup>                                                                                                                      | standard             | Yes  | Yes  | No  | No   |
| Fprom        | EGASP 41_108_8_encode_promoters_1114770211 <sup>a</sup>                                                                                                                | standard             | No   | Yes  | Yes | Yes  |
| CpGProD      | <a href="http://pbil.univ-lyon1.fr/software/cpgprod_query.html">http://pbil.univ-lyon1.fr/software/cpgprod_query.html</a> <sup>b</sup>                                 | default              | No   | No   | Yes | No   |
| DGSF         | <a href="http://research.i2r.a-star.edu.sg/promoter/dragonGSF1_0/genestart.htm">http://research.i2r.a-star.edu.sg/promoter/dragonGSF1_0/genestart.htm</a> <sup>b</sup> | default              | No   | Yes  | Yes | No   |
| DPF          | <a href="http://research.i2r.a-star.edu.sg/promoter/promoter1_5/DPF.htm">http://research.i2r.a-star.edu.sg/promoter/promoter1_5/DPF.htm</a> <sup>b</sup>               | 0.5;0.55;0.65        | No   | Yes  | Yes | No   |
| EPONINE      | <a href="http://www.sanger.ac.uk/Users/td2/eponine/eponine-scan.jar">http://www.sanger.ac.uk/Users/td2/eponine/eponine-scan.jar</a> <sup>c</sup>                       | default              | No   | No   | Yes | Yes  |
| PROMOTER2.0  | <a href="http://www.cbs.dtu.dk/services/Promoter/">http://www.cbs.dtu.dk/services/Promoter/</a> <sup>b</sup>                                                           | default              | No   | No   | No  | No   |
| PROSCAN      | <a href="http://thr.cit.nih.gov/molbio/proscan/">http://thr.cit.nih.gov/molbio/proscan/</a> <sup>b</sup>                                                               | default, 0.8         | No   | No   | No  | Yes  |
| FirstEF      | <a href="http://rulai.cshl.edu/tools/FirstEF">http://rulai.cshl.edu/tools/FirstEF</a> <sup>b</sup>                                                                     | default              | No   | Yes  | Yes | No   |
| NNPP         | <a href="http://www.fruitfly.org/seq_tools/promoter.html">http://www.fruitfly.org/seq_tools/promoter.html</a> <sup>b</sup>                                             | 0.8;0.9;0.95         | No   | No   | No  | Yes  |

**Table S1.** Sources of TSS predictions from other published methods. <sup>a</sup> Predictions are directly downloaded from EGASP ftp directory [ftp://genome.imim.es/pub/projects/genencode/data/egasp05/egasp\\_submissions\\_2005050](ftp://genome.imim.es/pub/projects/genencode/data/egasp05/egasp_submissions_2005050). <sup>b</sup> Predictions have been computed using the appropriate web resource. <sup>c</sup> Program has been download and executed to compute predictions. Columns 4, 5, 6 and 7 columns indicate if the method is based on conservation of DNA across the species, on gene structure, CpG content and TATA-box respectively.

| ALL         | SENS | PPV  | SPEC    | CC   | AE     | K2       | Q       | GDIP1    | GDIP2 | GDIP3    | ASM   |
|-------------|------|------|---------|------|--------|----------|---------|----------|-------|----------|-------|
| Prostar     | 0.33 | 0.78 | 0.99999 | 0.51 | 95.84  | 22189.18 | 0.99998 | 3.98E-05 | 2.01  | 3.98E-05 | 2.78  |
| cpgprod     | 0.24 | 0.33 | 0.99997 | 0.28 | 115.17 | 13534.01 | 0.99982 | 5.34E-05 | 3.70  | 5.34E-05 | 8.33  |
| dgsf        | 0.04 | 0.28 | 0.99999 | 0.10 | 133.25 | 16012.04 | 0.99971 | 5.74E-05 | 27.67 | 5.74E-05 | 9.11  |
| dpf         | 0.27 | 0.38 | 0.99997 | 0.32 | 88.85  | 14379.95 | 0.99986 | 5.06E-05 | 3.14  | 5.06E-05 | 7.22  |
| eponine     | 0.27 | 0.58 | 0.99999 | 0.40 | 93.66  | 18260.52 | 0.99994 | 4.46E-05 | 2.77  | 4.46E-05 | 5.22  |
| firstef     | 0.46 | 0.42 | 0.99996 | 0.44 | 102.55 | 14491.43 | 0.99991 | 4.89E-05 | 1.81  | 4.89E-05 | 5.44  |
| fprom       | 0.34 | 0.73 | 0.99999 | 0.50 | 58.07  | 21518.69 | 0.99997 | 3.97E-05 | 1.97  | 3.97E-05 | 2.89  |
| mcpromoter  | 0.24 | 0.66 | 0.99999 | 0.40 | 69.76  | 19124.55 | 0.99995 | 4.54E-05 | 3.16  | 4.54E-05 | 5.33  |
| nnpp        | 0.28 | 0.04 | 0.99955 | 0.10 | 101.24 | 2038.02  | 0.99765 | 4.50E-04 | 27.56 | 4.50E-04 | 10.89 |
| nscan       | 0.38 | 0.82 | 1.00000 | 0.56 | 107.62 | 24160.85 | 0.99998 | 3.68E-05 | 1.62  | 3.68E-05 | 1.11  |
| promoter2.0 | 0.13 | 0.04 | 0.99982 | 0.07 | 104.83 | 4253.96  | 0.99764 | 1.91E-04 | 23.98 | 1.91E-04 | 11.00 |
| proscan     | 0.09 | 0.32 | 0.99999 | 0.17 | 112.36 | 15433.66 | 0.99977 | 5.51E-05 | 10.85 | 5.51E-05 | 8.67  |
| TEST        | SENS | PPV  | SPEC    | CC   | AE     | K2       | Q       | GDIP1    | GDIP2 | GDIP3    | ASM   |
| Prostar     | 0.29 | 0.76 | 0.99999 | 0.47 | 97.34  | 21436.38 | 0.99997 | 4.16E-05 | 2.43  | 4.16E-05 | 3.00  |
| cpgprod     | 0.25 | 0.30 | 0.99997 | 0.27 | 110.31 | 12921.28 | 0.99980 | 5.52E-05 | 3.85  | 5.52E-05 | 8.44  |
| dgsf        | 0.04 | 0.31 | 0.99999 | 0.11 | 127.27 | 16343.71 | 0.99975 | 5.63E-05 | 24.93 | 5.63E-05 | 8.78  |
| dpf         | 0.24 | 0.36 | 0.99997 | 0.29 | 90.64  | 14422.16 | 0.99984 | 5.09E-05 | 3.62  | 5.09E-05 | 7.22  |
| eponine     | 0.21 | 0.49 | 0.99999 | 0.32 | 100.51 | 17027.02 | 0.99991 | 4.77E-05 | 3.85  | 4.77E-05 | 6.11  |
| firstef     | 0.40 | 0.40 | 0.99997 | 0.40 | 99.04  | 14422.16 | 0.99990 | 4.90E-05 | 2.11  | 4.90E-05 | 5.56  |
| fprom       | 0.34 | 0.74 | 0.99999 | 0.50 | 62.39  | 21944.59 | 0.99997 | 3.92E-05 | 1.99  | 3.92E-05 | 2.67  |
| mcpromoter  | 0.23 | 0.68 | 0.99999 | 0.39 | 81.53  | 19468.89 | 0.99996 | 4.54E-05 | 3.40  | 4.54E-05 | 4.67  |
| nnpp        | 0.27 | 0.03 | 0.99955 | 0.10 | 97.43  | 2041.68  | 0.99762 | 4.49E-04 | 28.23 | 4.49E-04 | 11.11 |
| nscan       | 0.35 | 0.82 | 1.00000 | 0.54 | 103.82 | 23624.88 | 0.99998 | 3.82E-05 | 1.87  | 3.82E-05 | 1.11  |
| promoter2.0 | 0.14 | 0.04 | 0.99982 | 0.08 | 100.91 | 4333.93  | 0.99775 | 1.87E-04 | 23.26 | 1.87E-04 | 10.89 |
| proscan     | 0.08 | 0.30 | 0.99999 | 0.15 | 114.03 | 15568.96 | 0.99975 | 5.48E-05 | 12.13 | 5.48E-05 | 8.44  |

**Table S2.** Prediction results using the Havana annotations over the Encode region. Table shows scores for the training set and the test set using a maximum distance for TP of 250nt ( $D = 250$ ). Measures are described in Supplementary Methods.
